# Supplementary material for: Occurrence and risk assessment of polycyclic aromatic hydrocarbons in soil from the Tiefa coal mine district, Liaoning, China
Source: Royal Society of Chemistry journal article supplement (doi:10.1039/c2em30433c), 2012-01-01
Supplement: c2em30433c.pdf [file c2em30433c.pdf]

C2EM30433C

Occurrence and risk assessment of polycyclic aromatic hydrocarbons in soil from the Tiefert coal mine district, Liaoning, China

Ms Jingjing Liu, University of Science and Technology of China Hefei 230026 China

Supplementary Information:

Factor analysis scores following Varimax rotation Matrix<sup>a</sup> for all PAHs (factor loadings >0.7 are selected)

| variable         | Component   |                 |                            |           |
|------------------|-------------|-----------------|----------------------------|-----------|
|                  | 1           | 2               | 3                          | 4         |
| Chry             | .943*       | -.014           | .184                       | -.073     |
| BaA              | .925*       | .234            | .177                       | -.117     |
| Pyr              | .922*       | .131            | .273                       | -.164     |
| BbF              | .906*       | .281            | .210                       | .053      |
| Flan             | .821*       | .305            | .334                       | .113      |
| Anth             | .809*       | .073            | .508                       | .005      |
| BkF              | .755*       | .357            | -.306                      | .257      |
| IP               | .652        | .391            | -.047                      | .451      |
| Acen             | .286        | .944*           | .031                       | .086      |
| DBA              | .105        | .930*           | -.008                      | -.001     |
| Flu              | .199        | .819*           | .102                       | -.021     |
| Naph             | .169        | .807*           | .367                       | .262      |
| Phen             | .206        | .021            | .869*                      | .000      |
| BaP              | .416        | .282            | .744*                      | .052      |
| BP               | .091        | .040            | .061                       | -.721*    |
| Acy              | .091        | .384            | .396                       | .614      |
| % of variance    | 37.869      | 22.354          | 13.003                     | 10.945    |
| % cumulative     | 37.869      | 60.224          | 73.226                     | 84.171    |
| Probable sources | Coal gangue | Coal combustion | Wood and diesel combustion | Vehicular |

Notes: \*Represent factor loading >0.7; Extraction Method: Principal Component Analysis; Rotation Method: Varimax with Kaiser Normalization; <sup>a</sup>, Rotation converged in 6 iterations.
